# Supplementary material for: Antibacterial Mode of Action of the Daucus carota Essential Oil Active Compounds against Campylobacter jejuni and Efflux-Mediated Drug Resistance in Gram-Negative Bacteria
Source: MDPI journal article supplement (doi:10.3390/molecules25225448), 2020-11-20
Supplement: s1 [file s1]

## Supplementary Data

Figure 1. Kinetics of bactericidal effect. Rapid CFU decrease with the DCEO and its active molecules against stationary phase grown cells of *C. jejuni* F38011 using time kill assays for 30 minutes with concentrations corresponding to MIC, 2x MIC, and 4x MIC. Control cells were treated with DMSO and carvacrol was used as a positive standard. A: effect of the entire DCEO and EMIE. B: effect of Oxy-Fr and elemicin. Data are the means  $\pm$  SEM from three independent experiments.

A

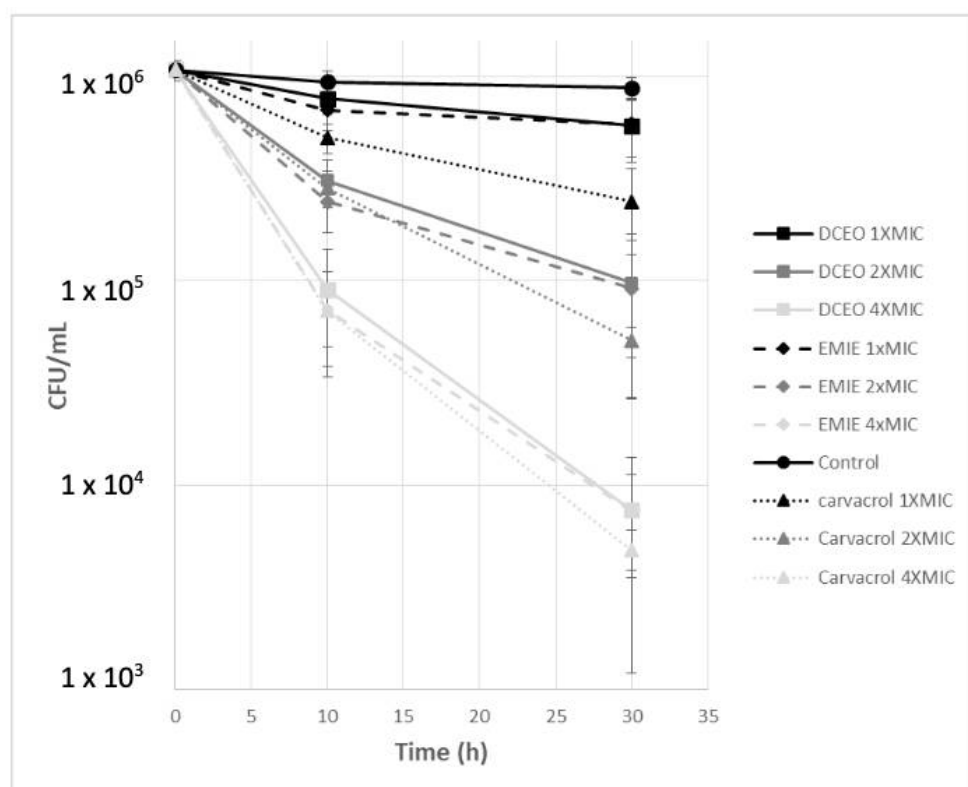

B

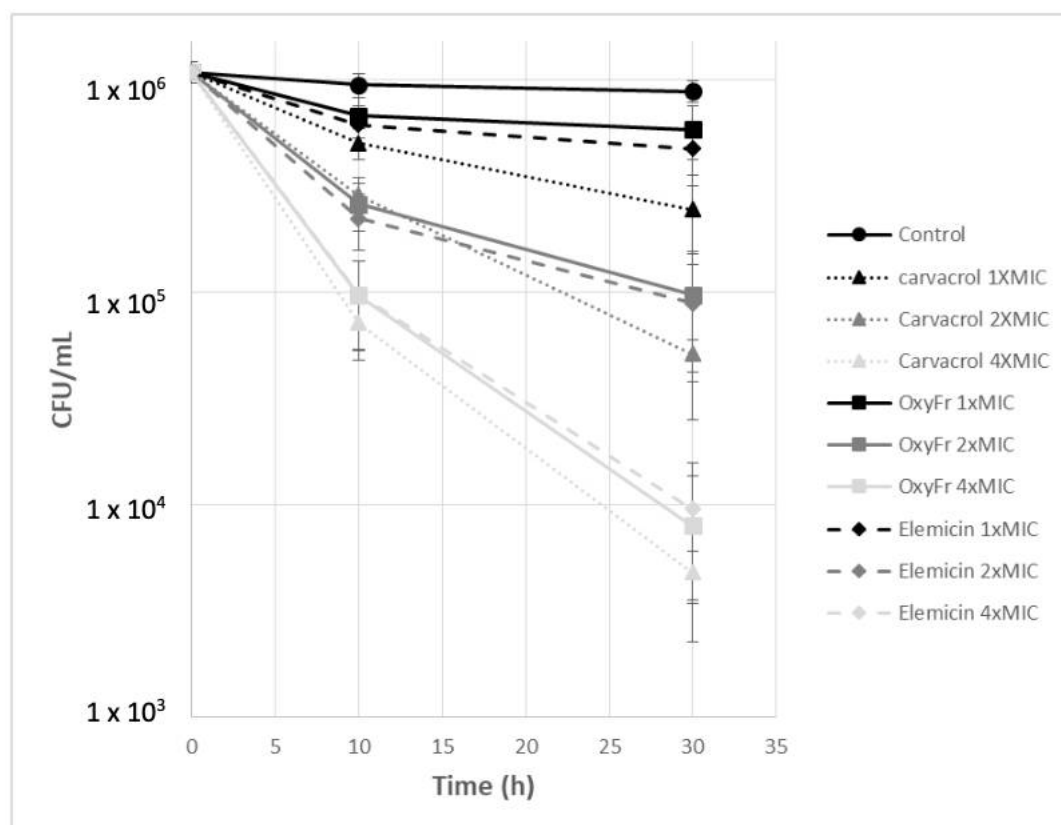

Figure S2: Outer membrane protein detection. Immunodetection using Omp50 outer membrane protein specific antibodies on *Campylobacter* cells treated with 4xMIC DCEO and 4xMIC EMIE. DMSO and SDS were used as negative and positive standards, respectively.

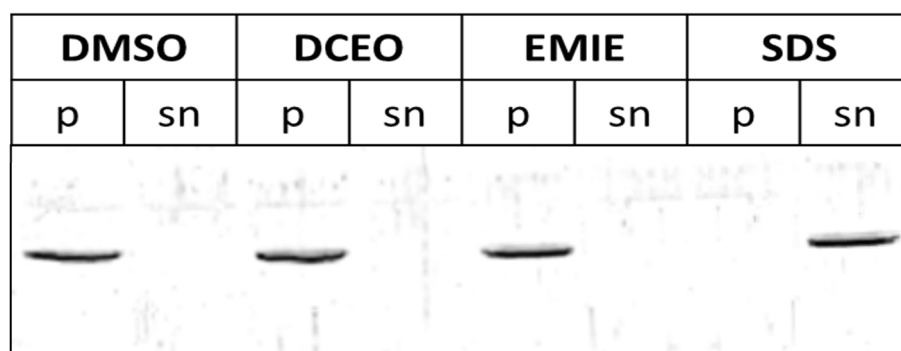

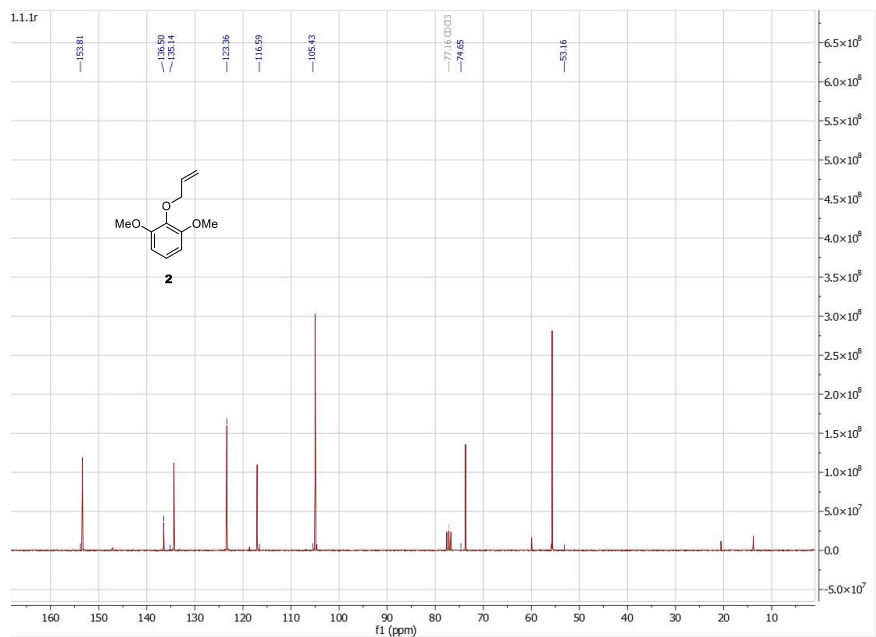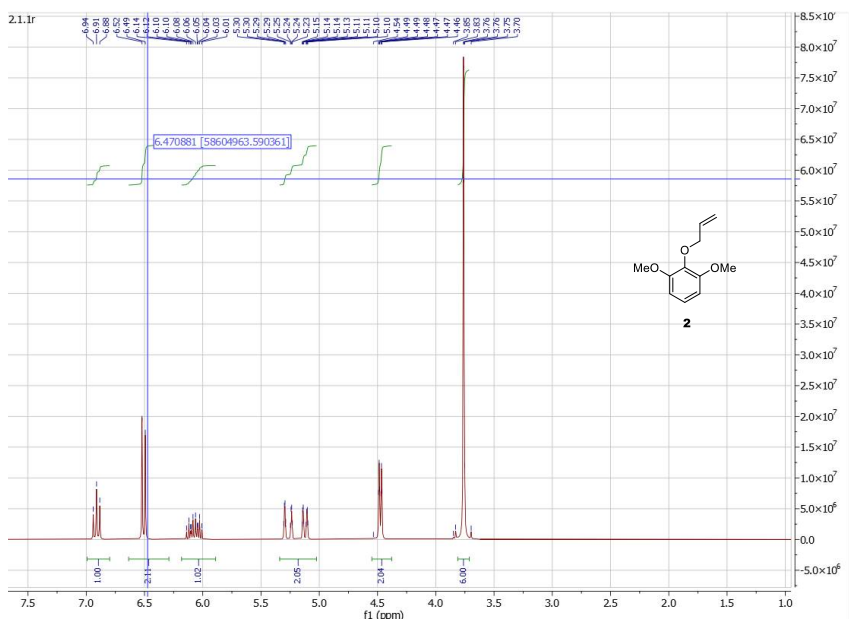

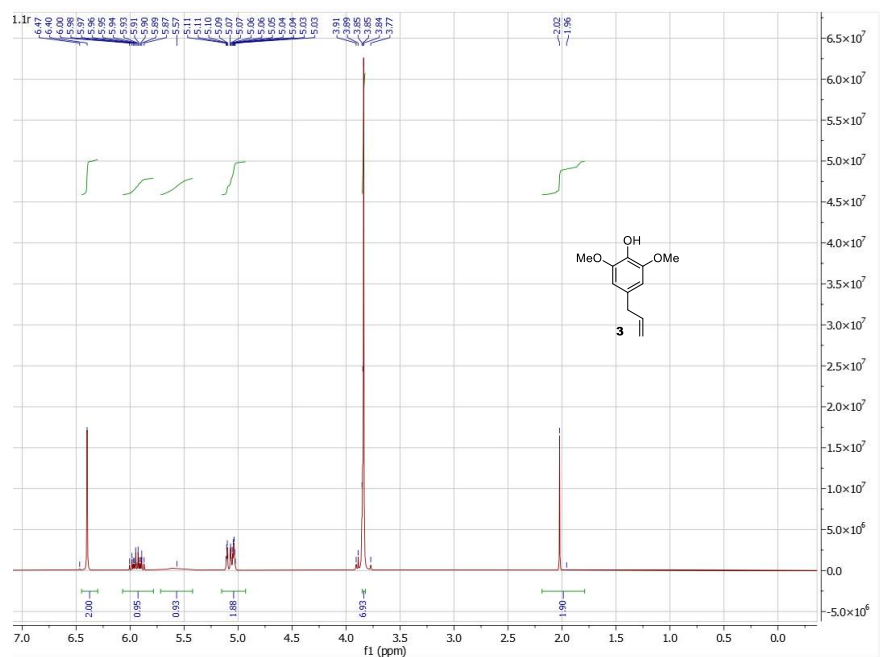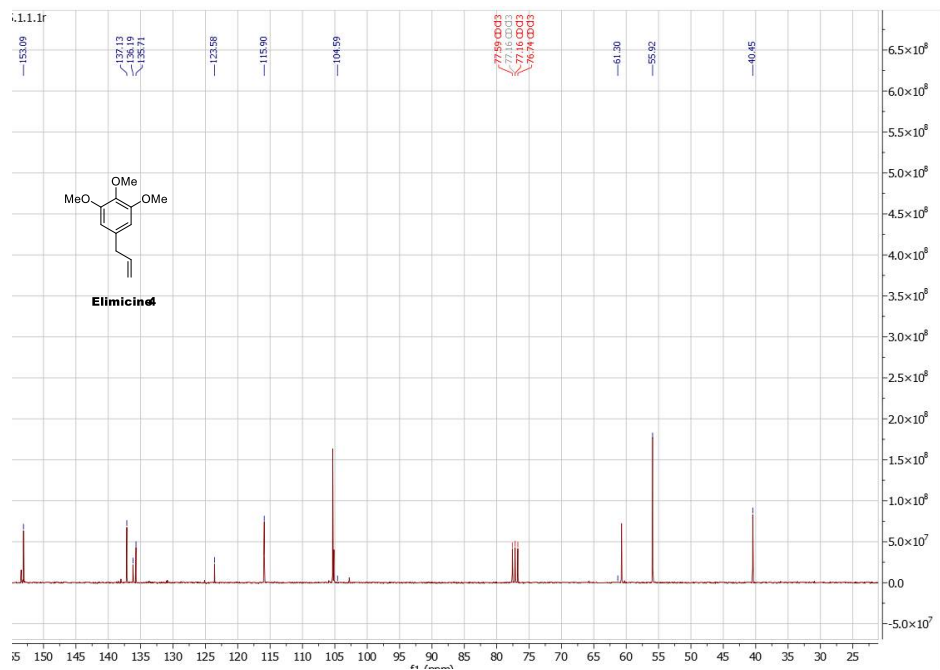

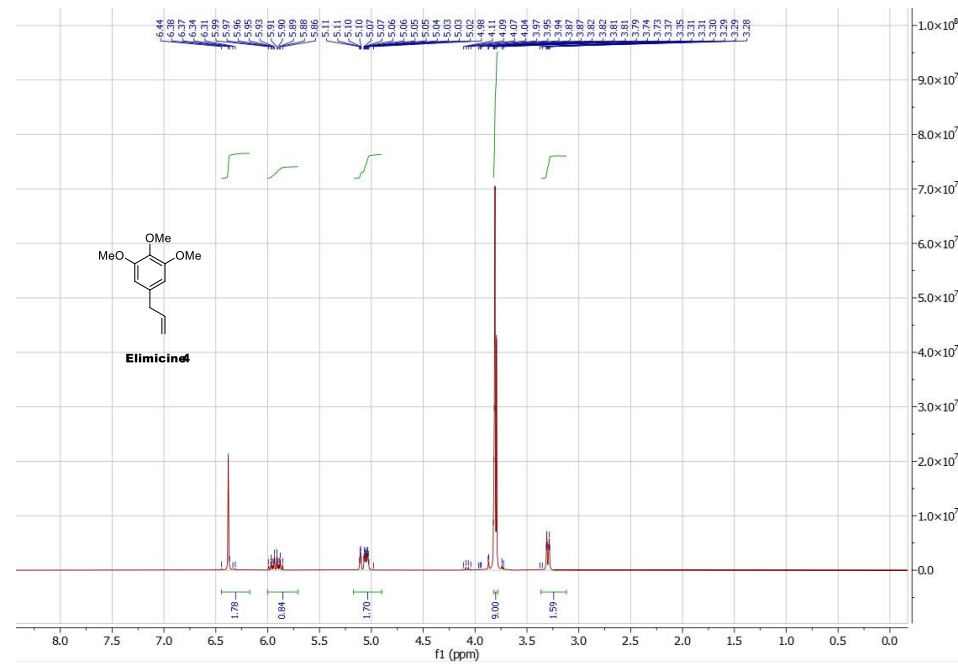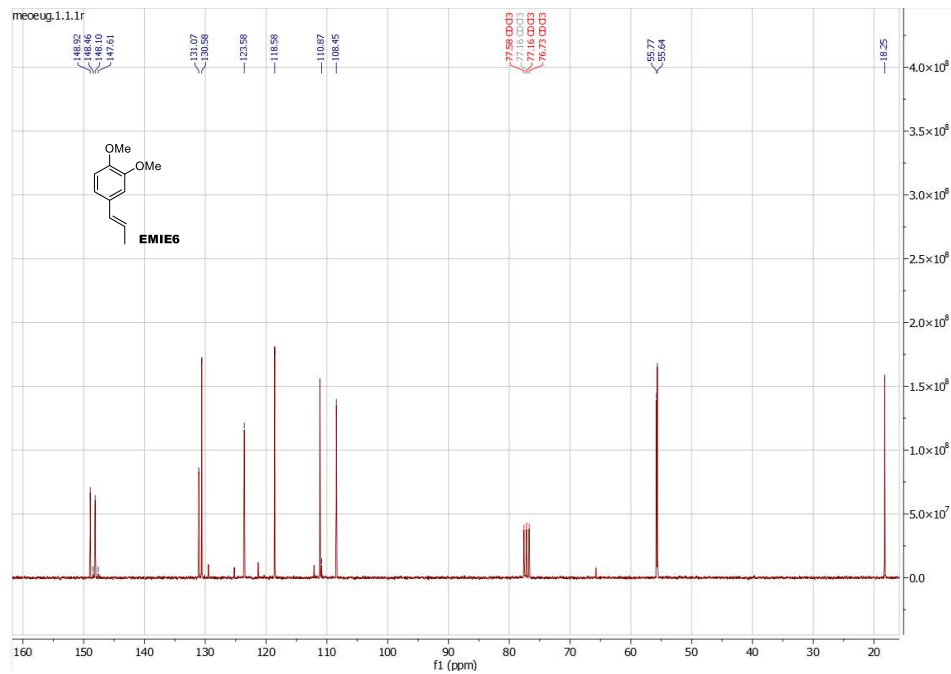

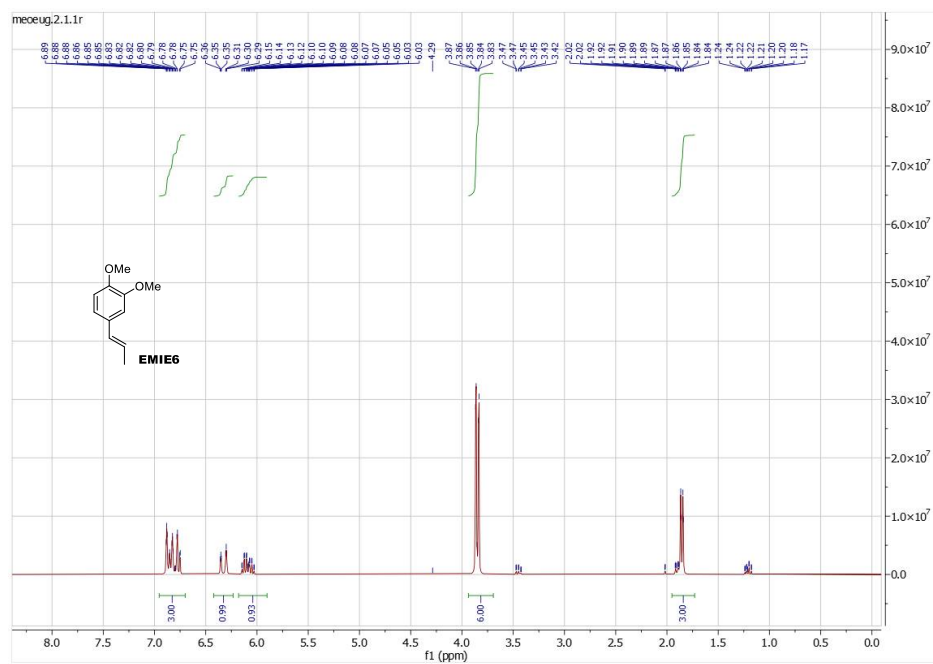

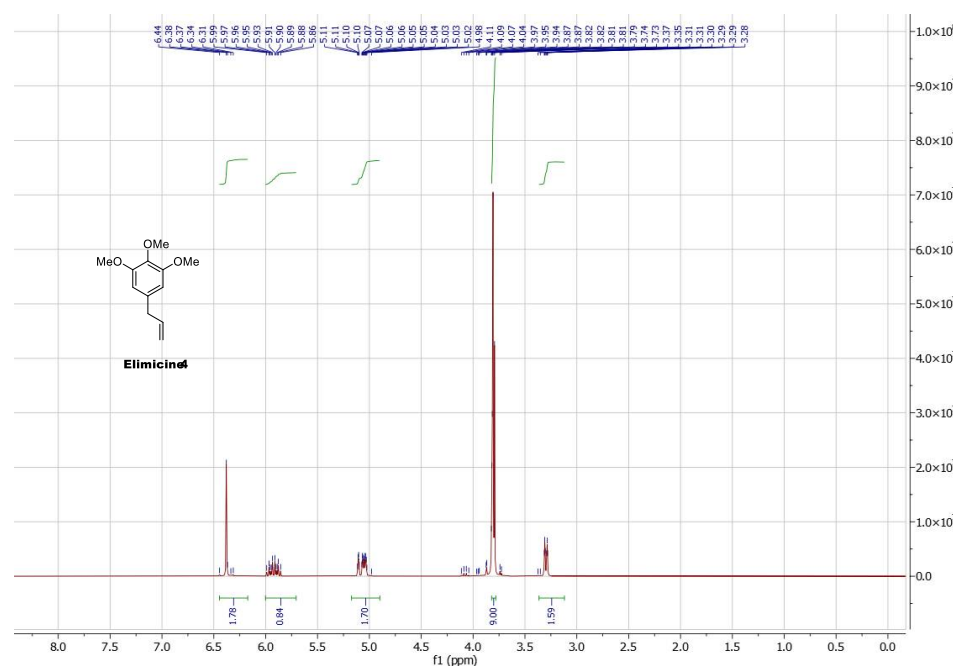

Table 1. Effect of compounds on cell integrity; Optical Density at 600 nm after cell treatment with DCEO, EMIE, elemicin, and carvacrol at 4 x MIC. SDS: Sodium Dodecyl Sulphate; TCA: Tri chloroacetic acid. Data are the means +/- SEM from three independent experiments.

| Time<br>(min) | DMSO        | DCEO<br>4MIC | EMIE<br>4MIC | Elemicin<br>4MIC | Carvacrol<br>4MIC | SDS 0,01%   | TCA 0,15%   |
|---------------|-------------|--------------|--------------|------------------|-------------------|-------------|-------------|
| 0             | 0.497±0.012 | 0.502±0.011  | 0.501±0.017  | 0.497±0.014      | 0.499±0.021       | 0.498±0.023 | 0,494±0.017 |
| 3             | 0.504±0.011 | 0.498±0.012  | 0.509±0.013  | 0.498±0.019      | 0.474±0.012       | 0.202±0.042 | 0.078±0.031 |
| 10            | 0.502±0.014 | 0.501±0.014  | 0.494±0.016  | 0.501±0.013      | 0.438±0.014       | 0.082±0.028 | 0.065±0.024 |
| 30            | 0.492±0.018 | 0.492±0.019  | 0.491±0.021  | 0.494±0.024      | 0.403±0.017       | 0.062±0.011 | 0.054±0.015 |
